# Supplementary material
Source: HighWire-hosted journal article supplement (https://qdcxjkg.com/highwire/filestream/131553/field_highwire_adjunct_files/1/ERJ-02018-2015_Supplement_figures.pdf)

Figure S1: Breakdown of patient's opinions on diagnosis according to (A) testing and availability of information and research to improve diagnostic testing, (B) the importance of a diagnosis and perceptions on specialist diagnostic centres and (c) perceptions to improvements in health and healthcare since diagnosis with PCD

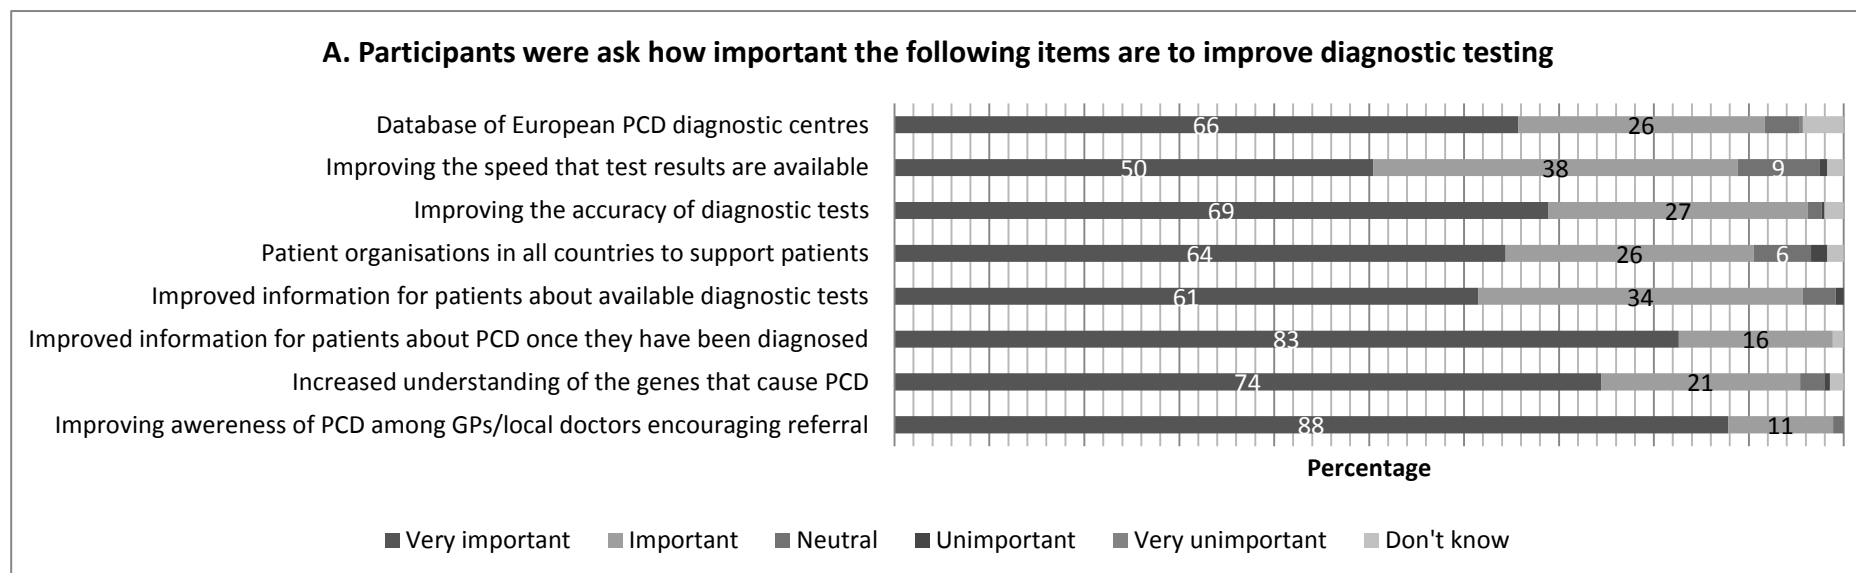

### B. Participants were asked to what extent do they agree or disagree with the following statements

It is important....

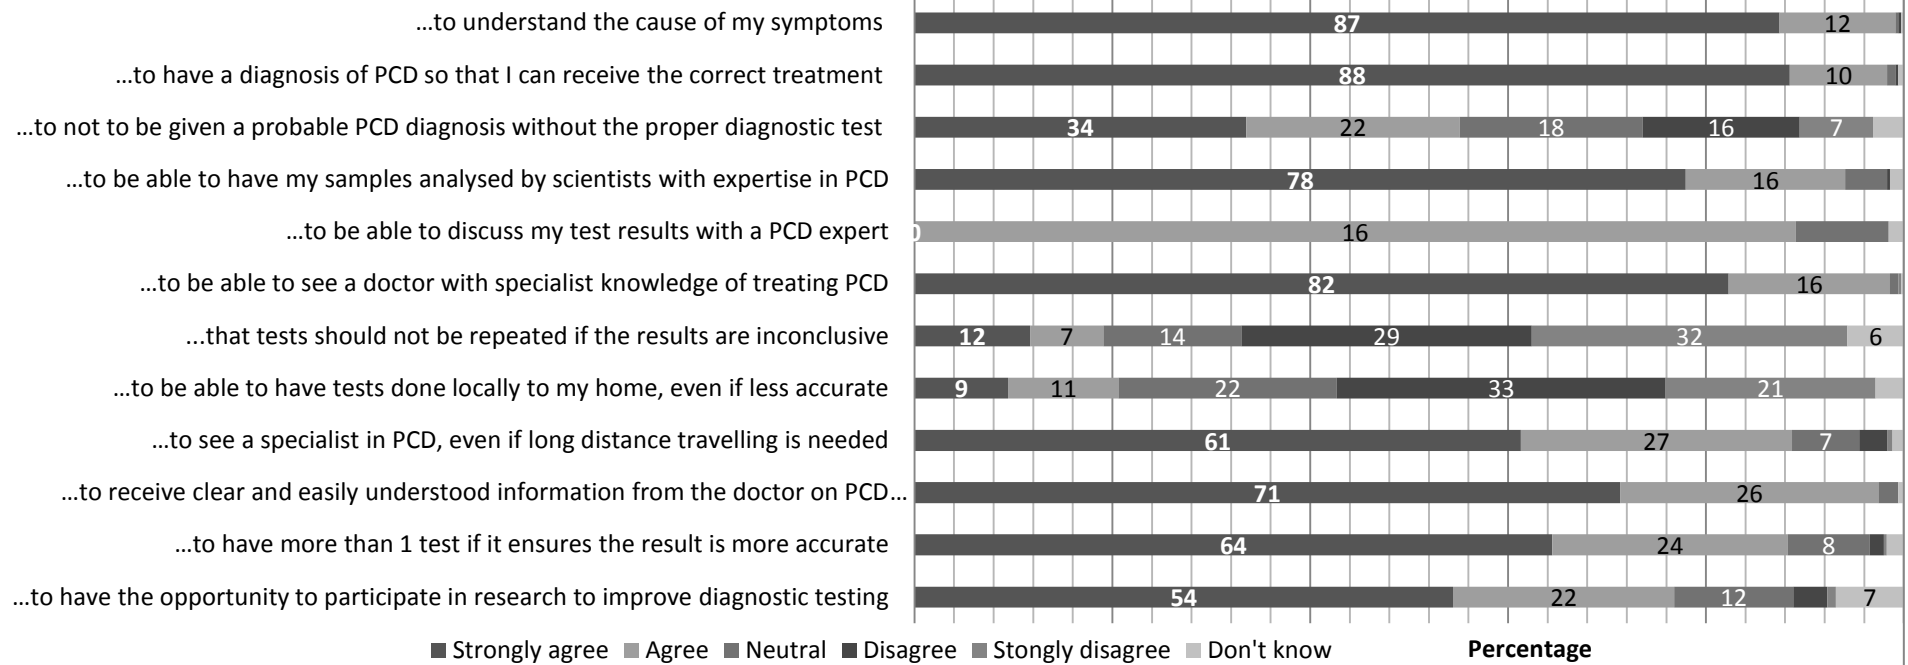

**C. Participants who have been tested and diagnosed with PCD were asked as to which of the statements they agreed with. Since diagnosis.....**

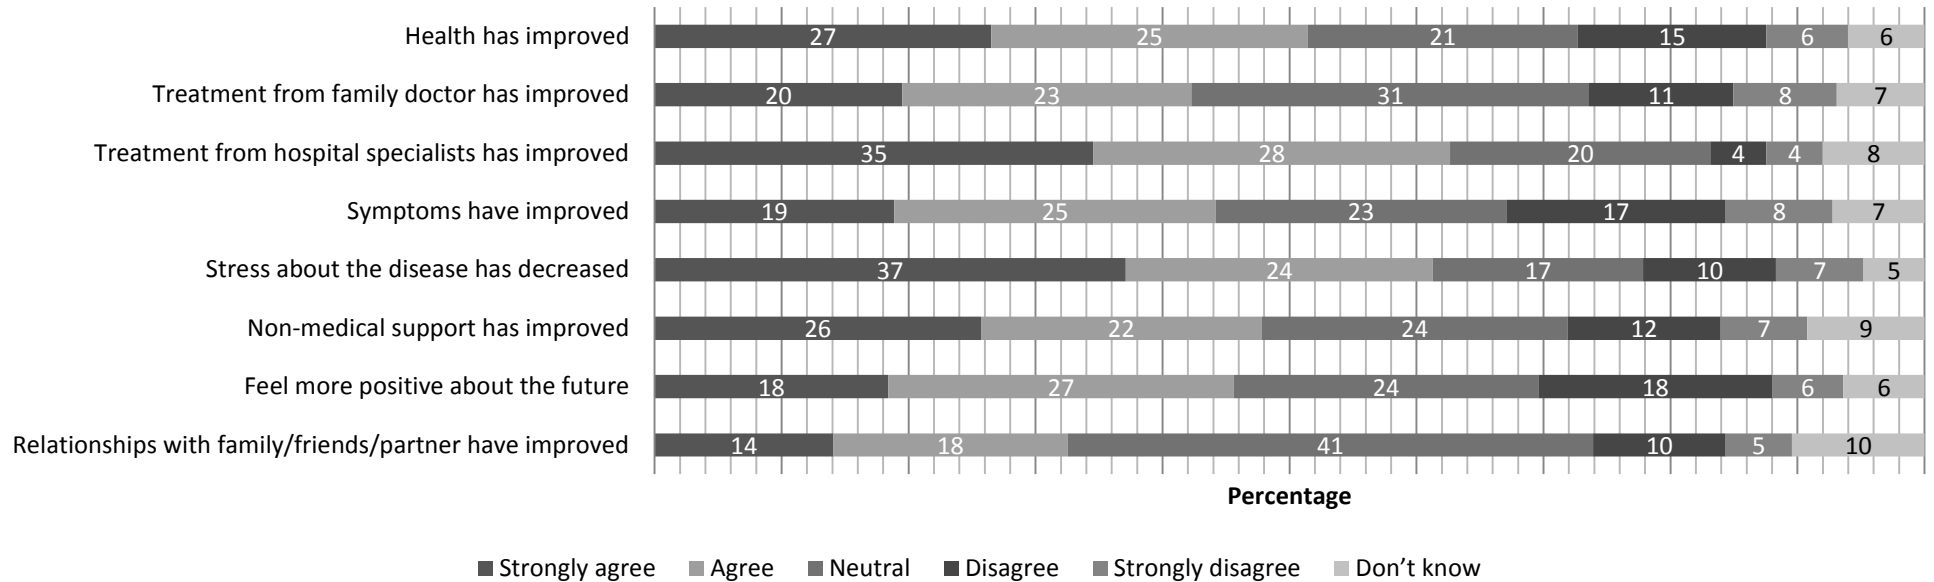

Supplement: ERJ-02018-2015_Supplement_figures.pdf [file ERJ-02018-2015_Supplement_figures.pdf]
